# Supplementary material for: Sarcoidosis mortality in Sweden: a population-based cohort study
Source: PubMed Central journal article supplement (PMC5886843; doi:10.1183/13993003.01815-2017), 2018-02-22
Supplement: ERJ-01815-2017_Supplement.pdf [file ERJ-01815-2017_Supplement.pdf]

## SUPPLEMENTARY

### Sarcoidosis mortality in Sweden: a population-based cohort study

Marios Rossides, Susanna Kullberg, Johan Askling, Anders Eklund, Johan Grunewald,  
Elizabeth V. Arkema

#### Contents

**Table E1.** ICD-10 codes used to identify comorbidities in the National Patient Register and weights used to calculate the Charlson Comorbidity Index score.

**Table E2.** Distributions of bias parameters used in probabilistic bias analyses to account for unmeasured confounding by current smoking and misclassification of sarcoidosis definition.

**Table E3.** Baseline characteristics of individuals with sarcoidosis who received treatment or not at diagnosis and their matched general population comparators entering the cohort after Oct 1, 2005.

**Table E4.** Ten most common underlying and contributory causes of death in individuals with sarcoidosis and their corresponding proportions in the general population (2003–2013).

**Table E5.** All-cause mortality in individuals with sarcoidosis compared to matched general population comparators entering the cohort Oct 1, 2005, overall and stratified by treatment status.

**Table E1.** ICD-10 codes used to identify comorbidities in the National Patient Register and weights used to calculate the Charlson Comorbidity Index score.

| Comorbidity                                                                       | ICD-10 codes*                                                                                                                                                       | Weight |
|-----------------------------------------------------------------------------------|---------------------------------------------------------------------------------------------------------------------------------------------------------------------|--------|
| Myocardial infarction                                                             | I21–I22, I25.2                                                                                                                                                      | 1      |
| Congestive heart failure                                                          | I09.9, I11.0, I13.0, I13.2, I25.5, I42.0, I42.5–I42.9, I43, I50, P29.0                                                                                              | 1      |
| Peripheral vascular disease                                                       | I70–I71, I73.1, I73.8, I73.9, I77.1, I79.0, I79.2, K55.1, K55.8–K55.9, Z95.8–Z95.9                                                                                  | 1      |
| Cerebrovascular disease                                                           | G45–G46, H34.0, I60–I69                                                                                                                                             | 1      |
| Dementia                                                                          | F00–F03, F05.1, G30, G31.1                                                                                                                                          | 1      |
| Chronic pulmonary disease                                                         | I27.8, I27.9, J40–J47, J60–J67, J68.4, J70.1, J70.3                                                                                                                 | 1      |
| Rheumatic disease                                                                 | M05–M06, M31.5, M32–M34, M35.1, M35.3, M36.0                                                                                                                        | 1      |
| Peptic ulcer disease                                                              | K25–K28                                                                                                                                                             | 1      |
| Mild liver disease                                                                | B18, K70.0–K70.3, K70.9, K71.3–K71.5, K71.7, K73–K74, K76.0, K76.2–K76.4, K76.8–K76.9, Z94.4                                                                        | 1      |
| Diabetes without chronic complications                                            | E10.0–E10.1, E10.6, E10.8–E10.9, E11.0–E11.1, E11.6, E11.8–E11.9, E12.0–E12.1, E12.6, E12.8–E12.9, E13.0–E13.1, E13.6, E13.8–E13.9, E14.0–E14.1, E14.6, E14.8–E14.9 | 1      |
| Diabetes with chronic complications                                               | E10.2–E10.5, E10.7, E11.2–E11.5, E11.7, E12.2–E12.5, E12.7, E13.2–E13.5, E13.7, E14.2–E14.5, E14.7                                                                  | 2      |
| Hemiplegia or paraplegia                                                          | G04.1, G11.4, G80.1, G80.2, G81–G82, G83.0–G83.4, G83.9                                                                                                             | 2      |
| Renal disease                                                                     | I12.0, I13.1, N03.2–N03.7, N05.2–N05.7, N18–N19, N25.0, Z49.0–Z49.2, Z94.0, Z99.2                                                                                   | 2      |
| Any malignancy, including lymphoma and leukaemia, except malignant skin neoplasms | C00–C26, C30–C34, C37–C41, C43, C45–C58, C60–C76, C81–C85, C88, C90–C97                                                                                             | 2      |
| Moderate or severe liver disease                                                  | I85.0, I85.9, I86.4, I98.2, K70.4, K71.1, K72.1, K72.9, K76.5, K76.6, K76.7                                                                                         | 3      |
| Metastatic solid tumour                                                           | C77–C80                                                                                                                                                             | 6      |
| AIDS/HIV infection                                                                | B20–B22, B24                                                                                                                                                        | 6      |

\* The Swedish version of the ICD-10 classification system came into effect in 1997.

The codes were taken from Quan *et al.*, 2005, *Med Care*, and the weights from Charlson *et al.*, 1987, *J Chronic Dis*.

**Table E2.** Distributions of bias parameters used in probabilistic bias analyses.

| <b>Bias parameter</b>                                  | <b>Type of distribution</b> | <b>Minimum</b> | <b>Lower mode</b> | <b>Upper mode</b> | <b>Maximum</b> |
|--------------------------------------------------------|-----------------------------|----------------|-------------------|-------------------|----------------|
| Unmeasured confounding by smoking                      |                             |                |                   |                   |                |
| Prevalence in sarcoidosis                              | Trapezoidal                 | 0.09           | 0.10              | 0.15              | 0.16           |
| Prevalence in controls                                 | Trapezoidal                 | 0.10           | 0.11              | 0.16              | 0.17           |
| Additive prevalence in all-cause death due to smoking* | Uniform                     | 0.12           | NA                | NA                | 0.16           |
| Sarcoidosis definition misclassification               |                             |                |                   |                   |                |
| Positive predictive value                              | Uniform                     | 0.50           | NA                | NA                | 0.70           |
| Negative predictive value                              | Uniform                     | 0.98           | NA                | NA                | 100.0          |

NA = not applicable.

Data are proportions.

\* Corresponds to a relative risk of all-cause death due to smoking of 2.60.

**Table E3.** Baseline characteristics of individuals with sarcoidosis who received treatment or not at diagnosis and their matched general population comparators entering the cohort after Oct 1, 2005.

|                                               | <b>Sarcoidosis,<br/>treated*<br/>(n=2599)</b> | <b>Sarcoidosis,<br/>not treated*<br/>(n=3592)</b> | <b>General<br/>population<br/>(n=61217)</b> |
|-----------------------------------------------|-----------------------------------------------|---------------------------------------------------|---------------------------------------------|
| Mean age at inclusion (SD),<br>years          | 49.8 (14.8)                                   | 49.8 (14.2)                                       | 49.8 (14.4)                                 |
| Sex, n (%)                                    |                                               |                                                   |                                             |
| Female                                        | 1087 (42)                                     | 1634 (45)                                         | 26938 (44)                                  |
| Male                                          | 1512 (58)                                     | 1958 (55)                                         | 34279 (56)                                  |
| Region of residence, n (%)                    |                                               |                                                   |                                             |
| Northern Sweden                               | 342 (13)                                      | 518 (14)                                          | 8539 (14)                                   |
| Middle Sweden                                 | 915 (35)                                      | 1548 (43)                                         | 24253 (40)                                  |
| Southern Sweden                               | 1342 (52)                                     | 1526 (42)                                         | 28425 (46)                                  |
| Country of birth, n (%)                       |                                               |                                                   |                                             |
| Nordic                                        | 2360 (91)                                     | 3195 (89)                                         | 53380 (88)                                  |
| Non-Nordic                                    | 239 (9)                                       | 397 (11)                                          | 7837 (13)                                   |
| Years of education, n (%)                     |                                               |                                                   |                                             |
| ≤9                                            | 532 (20)                                      | 659 (18)                                          | 11933 (19)                                  |
| 10–12                                         | 1353 (52)                                     | 1752 (49)                                         | 28312 (46)                                  |
| ≥13                                           | 695 (27)                                      | 1136 (32)                                         | 20243 (33)                                  |
| Missing                                       | 19 (1)                                        | 45 (1)                                            | 729 (1)                                     |
| Mean Charlson Comorbidity<br>Index score (SD) | 0.26 (0.82)                                   | 0.26 (0.95)                                       | 0.14 (0.62)                                 |

\* Defined as the dispensation of at least one prescription for oral corticosteroids, methotrexate, or azathioprine in the Prescribed Drug Register, three months before and after the first sarcoidosis visit.

**Table E4.** Ten most common underlying or contributory causes of death in individuals with sarcoidosis and their corresponding proportions in the general population comparators group.

| ICD-10                              |      |                                                             | Sarcoidosis<br>(n=445) | General<br>population<br>(n=2606) |
|-------------------------------------|------|-------------------------------------------------------------|------------------------|-----------------------------------|
| No.                                 | code | Disease/disorder's name                                     |                        |                                   |
| <b>Underlying causes of death</b>   |      |                                                             |                        |                                   |
| 1                                   | D86  | Sarcoidosis                                                 | 10.3                   | 0.0                               |
| 2                                   | I21  | Acute myocardial infarction                                 | 8.1                    | 8.1                               |
| 3                                   | I25  | Chronic ischemic heart disease                              | 4.7                    | 6.4                               |
| 4                                   | C34  | Malignant neoplasm of bronchus and lung                     | 4.3                    | 5.3                               |
| 5                                   | C18  | Malignant neoplasm of colon                                 | 2.9                    | 3.1                               |
| 6                                   | C56  | Malignant neoplasm of ovary                                 | 2.9                    | 1.4                               |
| 7                                   | C25  | Malignant neoplasm of pancreas                              | 2.7                    | 2.6                               |
| 8                                   | E14  | Unspecified diabetes mellitus                               | 2.7                    | 1.4                               |
| 9                                   | J84  | Other interstitial pulmonary diseases                       | 2.5                    | 0.7                               |
| 10                                  | C50  | Malignant neoplasm of breast                                | 2.3                    | 3.4                               |
| <b>Contributory causes of death</b> |      |                                                             |                        |                                   |
| 1                                   | D86  | Sarcoidosis                                                 | 30.1                   | 0.0                               |
| 2                                   | I50  | Heart failure                                               | 20.0                   | 16.1                              |
| 3                                   | C79  | Secondary malignant neoplasm of other and unspecified sites | 12.4                   | 12.7                              |
| 4                                   | I25  | Chronic ischemic heart disease                              | 12.4                   | 13.7                              |
| 5                                   | E14  | Unspecified diabetes mellitus                               | 11.5                   | 6.5                               |
| 6                                   | I21  | Acute myocardial infarction                                 | 10.6                   | 10.0                              |
| 7                                   | J18  | Pneumonia, organism unspecified                             | 10.3                   | 8.3                               |
| 8                                   | I46  | Cardiac arrest                                              | 8.8                    | 6.9                               |
| 9                                   | I10  | Essential (primary) hypertension                            | 8.5                    | 9.5                               |
| 10                                  | J84  | Other interstitial pulmonary diseases                       | 7.2                    | 1.0                               |

Data are percentage of total number of deaths.

**Table E5.** All-cause mortality in individuals with sarcoidosis compared to matched general population comparators entering the cohort Oct 1, 2005, overall and stratified by the receipt of treatment at diagnosis.

| <b>Analysis</b>                 | <b>n</b> | <b>Deaths/<br/>person-years</b> | <b>Hazard ratio<br/>(95% CI)*</b> |
|---------------------------------|----------|---------------------------------|-----------------------------------|
| <b>Overall</b>                  |          |                                 |                                   |
| Sarcoidosis                     | 6547     | 370/31377                       | 1.64 (1.46–1.83)                  |
| General population              | 64691    | 2158/314493                     | 1.00 [Reference]                  |
| <b>Treated at diagnosis†</b>    |          |                                 |                                   |
| Sarcoidosis, treated            | 2599     | 183/11908                       | 2.34 (1.99–2.75)                  |
| General population              | 25726    | 826/121293                      | 1.00 [Reference]                  |
| <b>Not treated at diagnosis</b> |          |                                 |                                   |
| Sarcoidosis, not treated        | 3592     | 136/16704                       | 1.13 (0.94–1.35)                  |
| General population              | 35491    | 1033/165286                     | 1.00 [Reference]                  |

\* Estimated by Cox models adjusted for age, sex, and region of residence, country of birth, education, and comorbidity (Charlson Index score).

† Defined as the dispensation of at least one prescription for oral corticosteroids, methotrexate, or azathioprine in the Prescribed Drug Register, three months before and after the first sarcoidosis visit.
